# Supplementary material
Source: PubMed Central journal article supplement (PMC4100783)
Supplement: bi500219t_si_001.pdf [file bi500219t_si_001.pdf]

**Ligand binding pocket bridges DNA-binding and dimerization domains  
of the urate-responsive MarR homolog MftR from *Burkholderia thailandensis***

Ashish Gupta and Anne Grove\*

Department of Biological Sciences, Louisiana State University  
Baton Rouge, LA 70803, USA

**Supplemental Tables**

**Table S1. Primers used**

| A             |                   |                                                        |
|---------------|-------------------|--------------------------------------------------------|
| MftR          | MftR_Fw           | CAGGAGGG <b>CA</b> TATGGATCGC                          |
|               | MftR_Rev          | GCTTGAC <b>GA</b> ATTCGGCGAGTC                         |
| W11F          | W11F_Fw           | GCGGTCGAGCAGT <b>TCC</b> GCAGCGAGCGCCCGGATCTCGATC      |
|               | W11F_Rev          | GCGCTCGCTGCG <b>GA</b> ACTGCTCGACCGCATGAGCTGCGCGATC    |
| D56S          | BTh_D56S_Fw       | GCCGGGCGAGTT <b>CTCC</b> GTGCTCGCGACGCTGC              |
|               | BTh_D56S_Rev      | GCGAGCACGG <b>GAGA</b> ACTCGCCCGGCTGCAGGCCGTAGC        |
| R63S          | BTh_R63S_Fw       | GCTGCGCAGCAGCGGGCGCGCCGTATGCGCTGAC                     |
|               | BTh_R63S_Rev      | GCGCCGCTGCTGCGCAGCGTCGCGAGCACGTC <b>GAA</b> CTC        |
| R89N          | BTh_R89N_Fw       | GCATGACGAACA <b>AC</b> ATCGATCGGCTCGAGAAGGCGGGGTGGGTC  |
|               | BTh_R89N_Rev      | GAGCCGATCGAT <b>GTT</b> GTTCGTCATGCTGCCCGACGAAATCATCGC |
| B             |                   |                                                        |
| <i>mftR</i>   | Fw                | GATCGATCGGCTCGAGAA                                     |
|               | Rev               | CTGCCCTTGCAACAGCTT                                     |
| <i>mftP</i>   | Fw                | GCCCATGCTTAATTCTCCTG                                   |
|               | Rev               | ATCAGCAGGATCGGCAAG                                     |
| <i>gapdH</i>  | Fw                | CTTCACGTCGAAGGAAAAGG                                   |
|               | Rev               | TGATAGACGTC <b>CC</b> GCAGCAC                          |
| C             |                   |                                                        |
| <i>mftR</i> O | <i>mftR</i> O_Top | CGTCCAAGTTATCTTGACGTAGAGACATGTCGAATC                   |
|               | <i>mftR</i> O_Bot | GATTCGACATGTCTCTACGTCAAGATAACTTGGACG                   |
| <i>mftP</i> O | <i>mftP</i> O_Top | TGTCGAATCTATCTTGATGTGCGAGACAATTATACGC                  |
|               | <i>mftP</i> O_Bot | GCGTATAATTGTCTCGACATCAAGATAGATTTCGACA                  |
| <i>mftO</i>   | Fw                | GAGCT <b>ACGCGT</b> CCATTAACCC                         |
|               | Rev               | GATGCG <b>ACGCGT</b> CCGGAC                            |

A. Gene cloning and mutagenesis. B. qRT-PCR. C. Primers for amplification of intergenic region *mftO* and oligonucleotides containing each cognate site. Restriction sites indicated in bold italics and substitutions required for site-directed mutagenesis in boldface.

**Table S2. Melting temperature of MftR and variants determined by CD spectroscopy**

| MftR variants | Melting temperature (°C) |
|---------------|--------------------------|
| MftR WT       | 50.4 ± 1.0 (D1)          |
|               | 60.0 ± 0.1 (D2)          |
| W11F          | 27.0 ± 0.7               |
| D56S          | 52.1 ± 0.2               |
| R63S          | 45.4 ± 0.6               |
| R89N          | 56.1 ± 0.4               |

**Table S3. Apparent dissociation constants of HucR and PecS variants**

| HucR variants <sup>a</sup> | $K_d$ (nM) | PecS variants <sup>b</sup> | $K_d$ (nM) |
|----------------------------|------------|----------------------------|------------|
| HucR WT                    | 0.6 ± 0.2  | WT PecS                    | 0.4 ± 0.0  |
| W20F                       | 1.7 ± 0.3  | W18F                       | **         |
| D73S                       | 0.3 ± 0.0  | D62S                       | 3.0 ± 0.2  |
| R80S                       | 0.4 ± 0.0  | R69S                       | 0.8 ± 0.1  |
| R106N                      | *          | R95N                       | ***        |

\*DNA binding was significantly compromised; non-specific complex was formed at  $\mu$ M concentration of HucR-R106N.

\*\*Mutation resulted in protein aggregation.

\*\*\*DNA binding to PecS promoter was completely abolished.

<sup>a</sup>From Perera et al. (2009) *J. Mol. Biol.* 390, 1019-1029. Apparent  $K_d$  for HucR binding to a single site.

<sup>b</sup>From Perera & Grove (2010) *J. Mol. Biol.* 402, 539-551. Apparent  $K_d$  for PecS binding to DNA with three cognate sites.

## Supplemental Figures

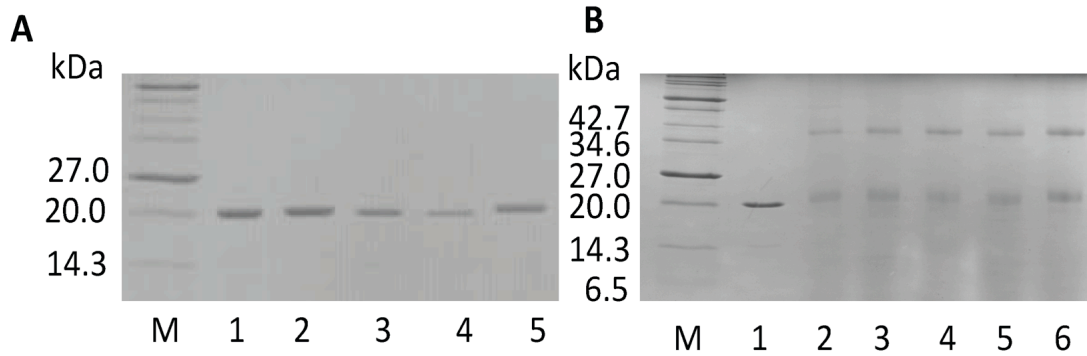

**Figure S1. SDS-PAGE gel (18%) showing purified WT MftR and single residue mutants and their crosslinked products.** (A) Left lane is protein marker (M) and lanes 1-5 are purified WT MftR, W11F, D56S, R63S and R89N, respectively. (B) Left lane (M) is protein marker. Lane 1 is WT MftR and lanes 2-6 contain 3.0  $\mu$ g protein crosslinked with glutaraldehyde: WT MftR, W11F, D56S, R63S and R89N, respectively. Proteins were crosslinked with 0.5% (v/v) glutaraldehyde.

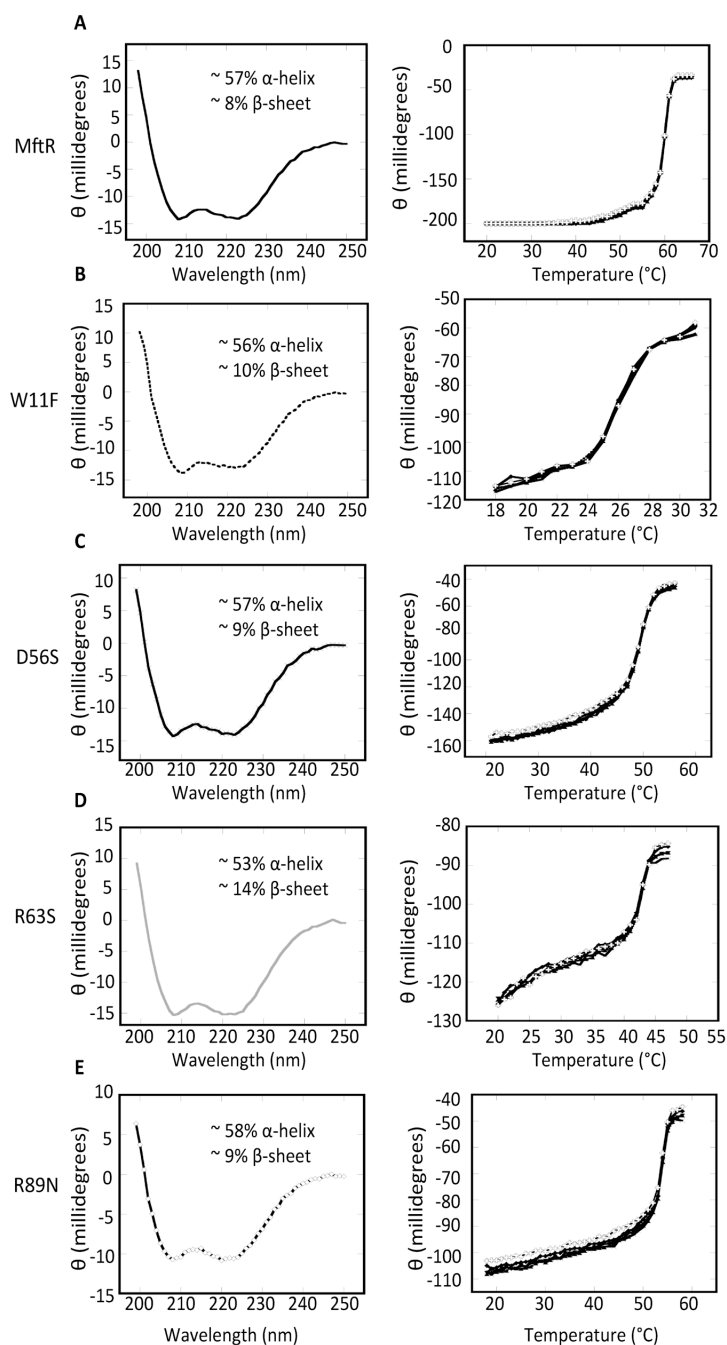

**Figure S2. CD spectral analysis of MftR and variants.** Left and right panels show the far UV CD spectrum and melting profile of MftR and variants, respectively. Machine units (millidegrees) were used to express ellipticity measurements. Ellipticity measurements were collected over the temperature range of 20-65 °C at five wavelengths spanning the negative ellipticity maximum characteristic of  $\alpha$ -helices: 220 nm ( $\times$ ); 221 nm ( $\blacktriangle$ ); 222 nm ( $\blacktriangledown$ ); 223 nm ( $\blacklozenge$ ); and 224 nm ( $\blackcross$ ). (A) Far-UV CD spectrum of MftR (solid black line) and thermal unfolding transition in right panel. (B) W11F (black dotted line). (C) D56S ( $\times$ ; solid black line). (D) R63S (solid gray line). (E) R89N ( $\blacklozenge$ ; solid black line).



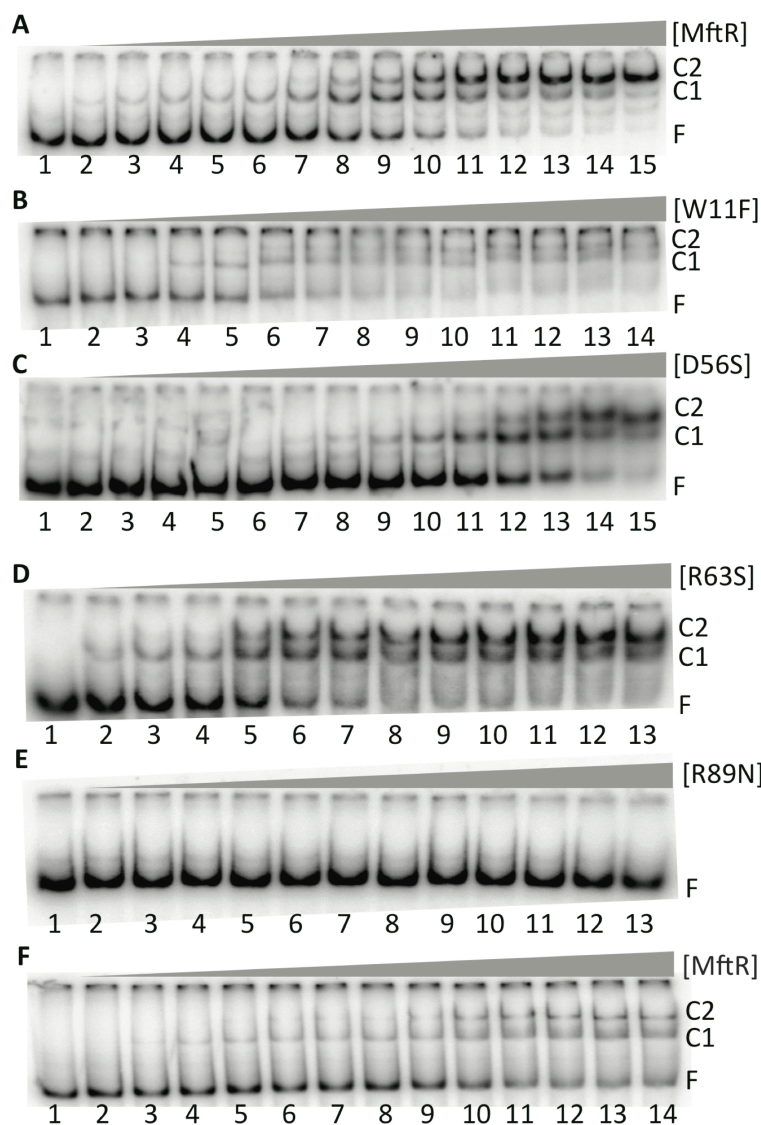

**Figure S3. MftR-*mftO* complexes with WT and MftR variants W11F, D56S, R63S, R89N.** (A) EMSA showing *mftO* (3.0 nM) titrated with increasing concentration of MftR (0.1 – 50 nM; lanes 2-15). F, C1 and C2 represent free DNA, complex 1 and complex 2, respectively. Reactions in panels A, C, D and E were incubated at room temperature. Reactions in the first lane of each panel contain DNA only. (B) *mftO* titration with increasing concentration of W11F (0.5 - 3000 nM; lanes 2-14; reactions were incubated at 4°C). (C) Increasing concentration of D56S with *mftO* (1 - 2000 nM; lanes 2-15). (D) R63S titrated with *mftO* (2 - 2000 nM; lanes 2-13). (E) *mftO* with increasing concentration of R89N (2 – 2000 nM; lanes 2-13). (F) *mftO* titration with increasing concentration of MftR (0.1 - 30 nM; lanes 2-14); reactions were incubated at 37°C and gel electrophoresis was performed at 37°C.

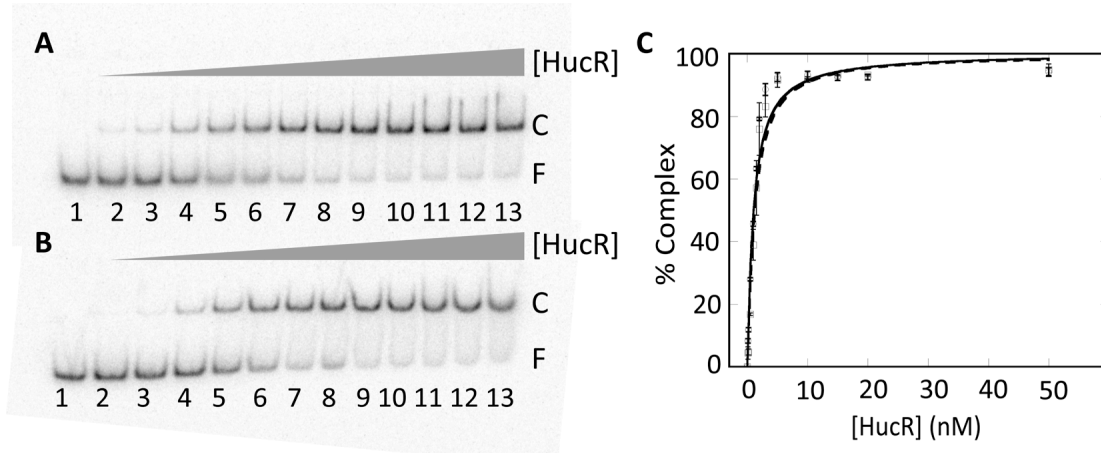

**Figure S4. HucR binds *HucO* comparably at room temperature and 37 °C.** (A) HucR-*HucO* complex (where *HucO* refers to 77 bp DNA containing HucR-binding site in *HucR* promoter) obtained by titration with increasing concentration of HucR (0.1 - 50 nM; lanes 2-13); reactions were incubated at room temperature and gel electrophoresis was performed at room temperature (22 °C). F and C represent free DNA and complex respectively. (B) HucR-*HucO* complex obtained by titration with increasing concentration of HucR (0.1 - 50 nM; lanes 2-13); reactions were incubated at 37 °C and gel electrophoresis was performed at 37 °C. (C) Fractional complex formation plotted as a function of HucR concentration. Binding isotherm with *HucO* at room temperature (□; solid line) and at 37 °C (○; dashed line). Error bars represent the standard deviation of three independent repeats.

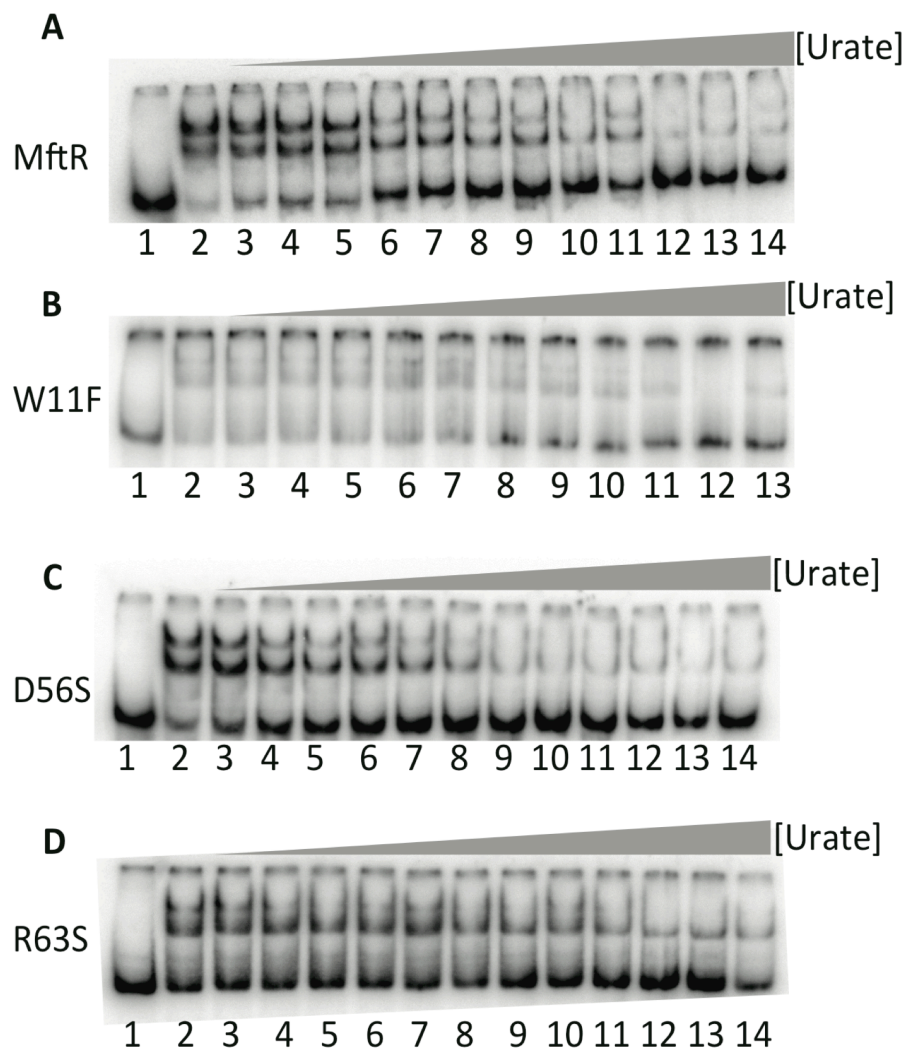

**Figure S5. Sensitivity of WT and MftR variants to urate.** (A) MftR-*mftO* complex titrated with increasing concentration of urate (1 - 25 mM; lanes 3-14). Reactions in lane 1 of each panel contain free DNA only (F), while lanes 2 of each panel is MftR-*mftO* without urate. (B) W11F-*mftO* complex titrated with increasing concentration of urate (1 - 30 mM; lanes 3-13). (C) D56S-*mftO* complex titrated with increasing concentration of urate (1 - 25 mM; lanes 3-14). (D) R63S-*mftO* complex titrated with increasing concentration of urate (1 - 25 mM; lanes 3-14).
